# Supplementary material
Source: PubMed Central journal article supplement (PMC9050909)
Supplement: NIHMS1793006-supplement-2.pdf [file NIHMS1793006-supplement-2.pdf]

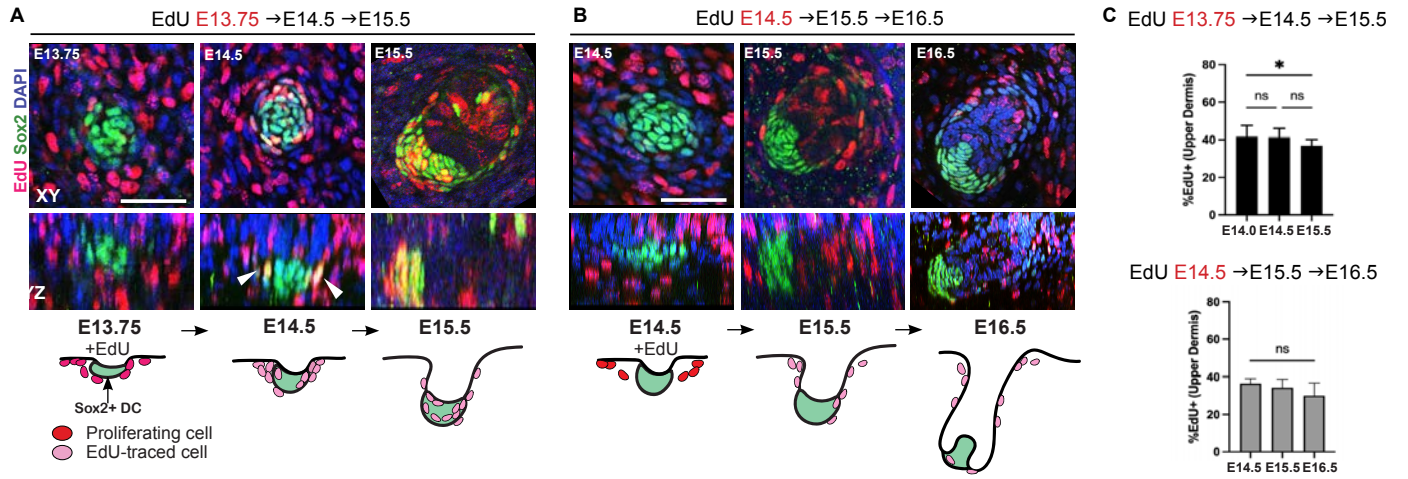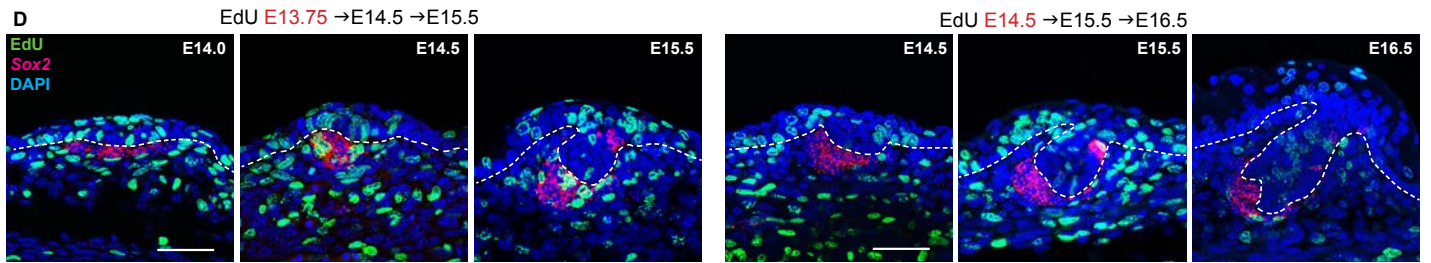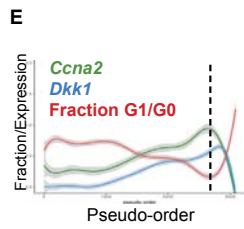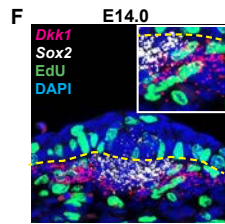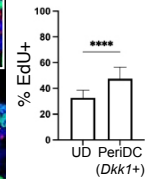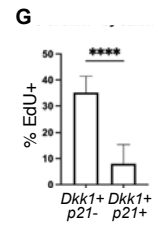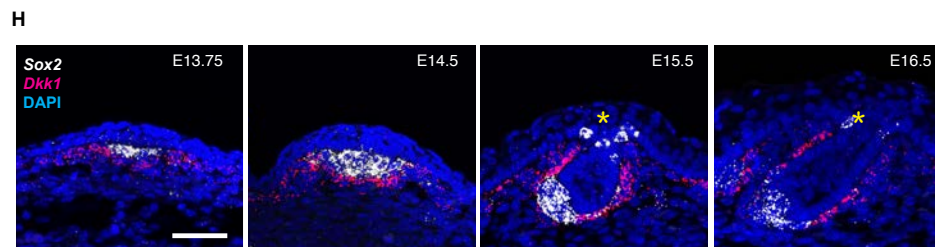

**Figure S1. Related to Figure 1. Selectively proliferative DC progenitors express *Dkk1* and reside in the peri-DC.**

**(A)** 3D view of skin explants after pulsing with EdU at E13.75. Cartoons beneath whole-mount views depict the location of EdU-traced dermal cells. **(B)** 3D view of skin explants after pulsing with EdU at E14.5. Cartoons beneath whole-mount views depict the location of EdU-traced dermal cells. **(C)** %EdU+ of upper dermal (UD) cells at indicated time points after either E13.75 EdU pulse (top) or E14.5 EdU pulse (bottom). **(D)** FISH: Sox2, EdU with EdU pulsed at E13.75 and harvested at indicated times (left); FISH: Sox2, EdU with EdU pulsed at E14.5 and harvested at indicated times (right); n=3 per time point. **(E)** Pseudo-order showing *Dkk1* and *Ccna2* expression and the fraction of G0/G1 cells; dashed line indicates highly proliferative state. **(F)** FISH showing *Dkk1*+ peri-DC cells are highly proliferative. **(G)** %EdU+ of *Dkk1*+/*p21*- or *Dkk1*+/*p21*+ (corner) peri-DC cells. **(H)** FISH showing *Dkk1* expression in the peri-DC/perifollicular region over time (asterik=Merkel cells); n=5 per time point. Data as mean  $\pm$  SEM, \* $P$ <0.05, \*\* $P$ <0.01, \*\*\* $P$ <0.001 and \*\*\*\* $P$ <0.0001, Student's *t*-test or one-way ANOVA; n=3; ns, not significant. Scale bars, 50  $\mu$ m.

**A**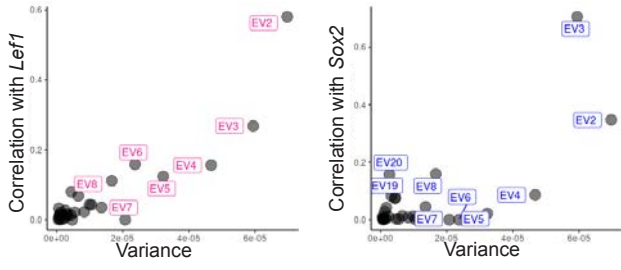**B**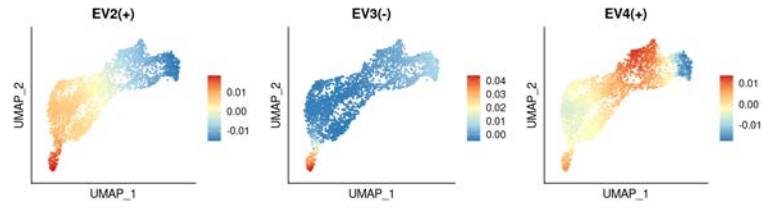

**Figure S2. Related to Figure 2. Defining components of a non-linear DC differentiation process by eigenvectors**

**(A)** Calculating correlation between leading 30 eigenvectors (EV) and expression level of *Lef1* or *Sox2*, as well as variance of eigenvectors that indicate relative informativeness. **(B)** UMAP of E14.5 dermal populations overlaid by values of EV2, EV3 and EV4. Different gradient patterns reflect their association with different biological processes.

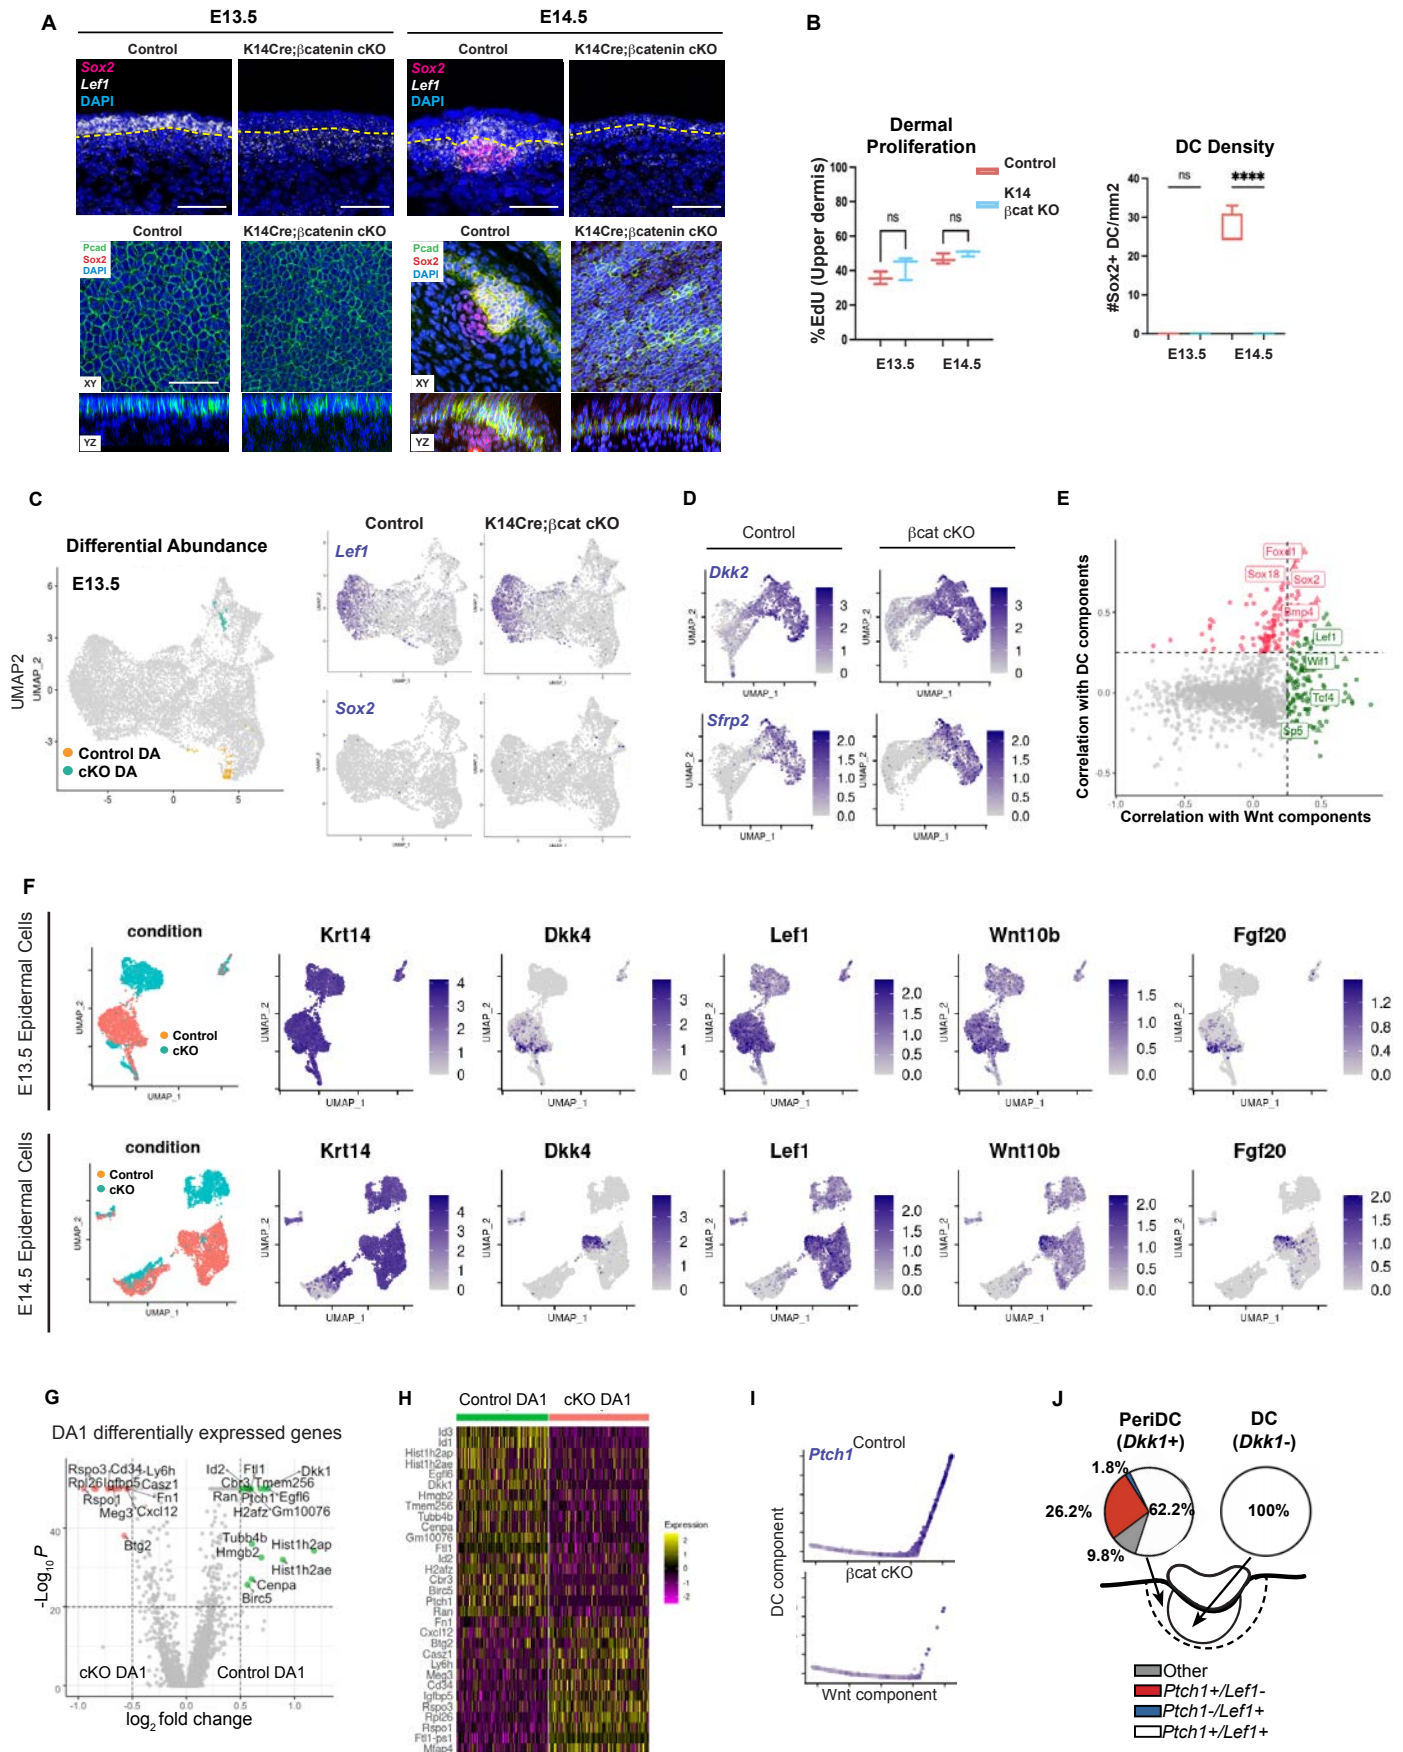

**Figure S3. Related to Figure 3. Using a genetic placode-deficient mutant to identify the placode-dependent factor required for DC differentiation.**

**(A)** FISH: *Sox2*, *Lef1* at E13.5 and E14.5 by condition (top, n=3); skin whole mounts at E13.5 and E14.5 by condition showing a lack of Sox2+ DCs in the mutant at both times (bottom). **(B)** EdU% of control and *K14Cre;βcat<sup>fl/fl</sup>* UD cells at E13.5 and E14.5 (left); DC density by condition at E13.5 and E14.5. **(C)** UMAP of E13.5 dermal populations overlaid by differentially abundant (DA) cell populations ( $P < 0.01$ ) and UMAPs of E13.5 dermal populations parsed by condition with *Lef1* and *Sox2* genes. **(D)** UMAPs of E14.5 dermal populations parsed by condition with LD markers, *Dkk2* and *Sfrp2*. **(E)** Correlation plot of top 2000 variable genes by Wnt and DC components (threshold 0.25), determined based on the diffusion maps of combined E14.5 control and *K14Cre;βcat<sup>fl/fl</sup>* dermal cells. **(F)** UMAPs of E13.5 (Top) and E14.5 (bottom) epidermal populations overlaid by condition or expression level of canonical placode markers. **(G)** Volcano plot of DEGs between control and *K14Cre;βcat<sup>fl/fl</sup>* DA1 populations. **(H)** Heatmap showing top significant DEGs between control and *K14Cre;βcat<sup>fl/fl</sup>* DA1 populations. **(I)** Diffusion maps of E14.5 *K14Cre;βcat<sup>fl/fl</sup>* and control dermal cells showing sparse DA2 outliers of mutant express *Ptch1*. **(J)** Distribution of *Lef1+Ptch1+* copositive vs. other cells in peri-DC and DC cells. Data as mean  $\pm$  SEM, \* $P < 0.05$ , \*\* $P < 0.01$ , \*\*\* $P < 0.001$  and \*\*\*\* $P < 0.0001$ , Student's *t*-test; n=3; ns, not significant. Scale bars, 50  $\mu$ m.



**A**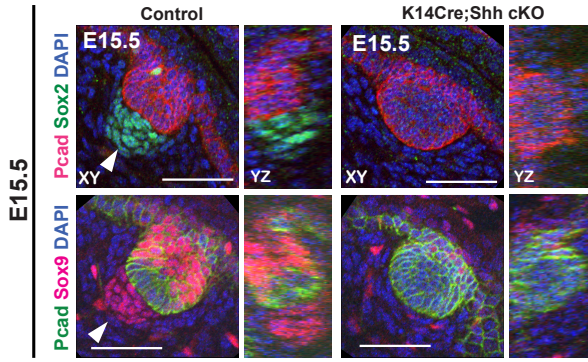**B**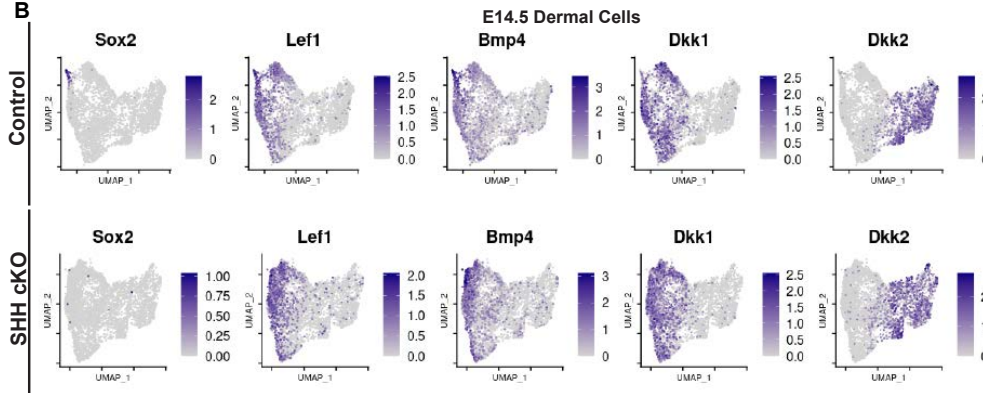**C**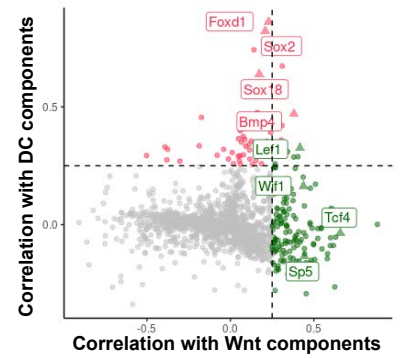**D**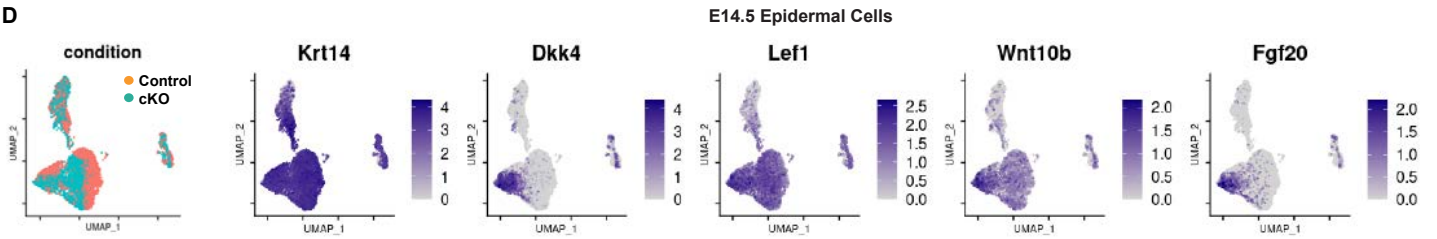

**Figure S4. Related to Figure 4. Characterization of SHH cKO scRNA-seq populations**

**(A)** E15.5 control and SHH cKO skin whole mount views stained for Sox2 or Sox9 DC markers (arrowhead) and epithelial marker, P-cadherin (n=6). **(B)** UMAPs of E14.5 dermal populations parsed by condition showing expression of canonical dermal gene markers. **(C)** Correlation plot of top 2000 variable genes by Wnt and DC components (threshold 0.25), based on the diffusion maps of combined E14.5 control and SHH cKO dermal cells. **(D)** UMAPs of E14.5 epidermal populations overlaid by condition or with placode gene markers. Scale bars, 50  $\mu$ m.



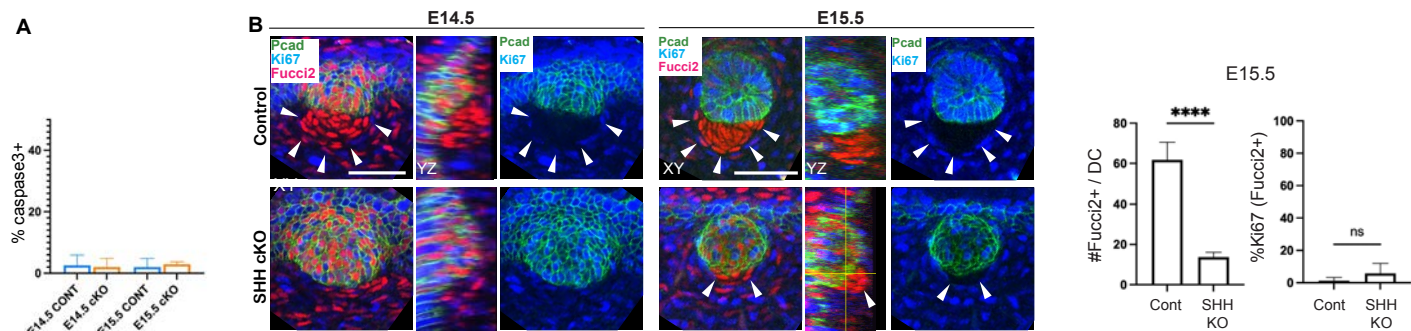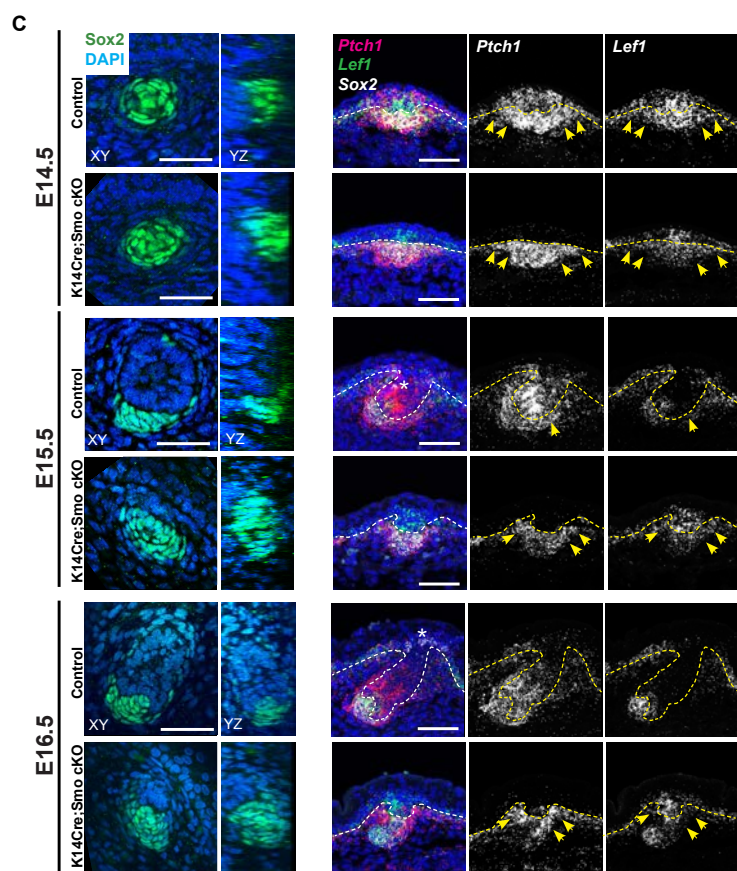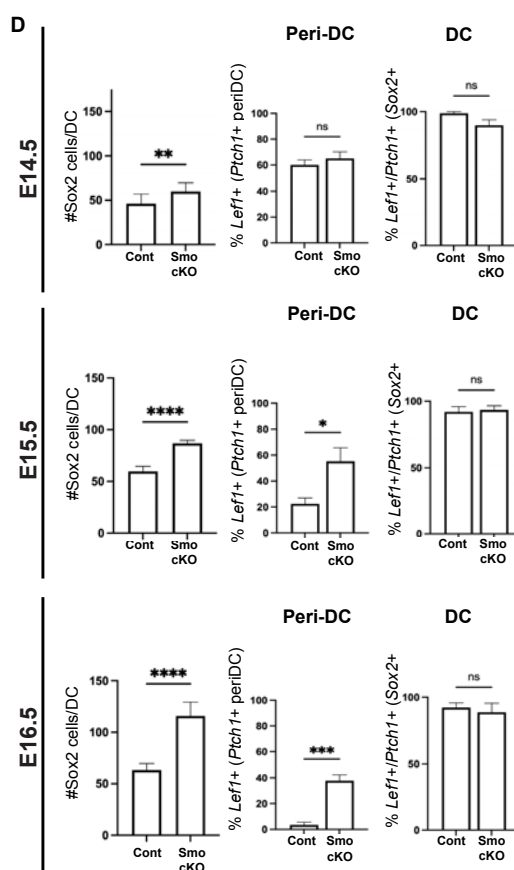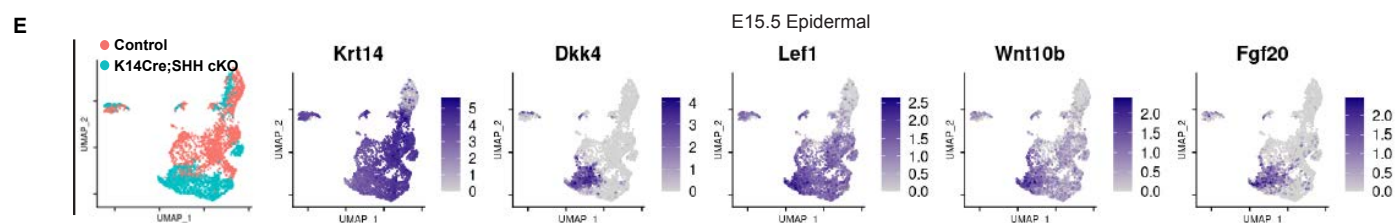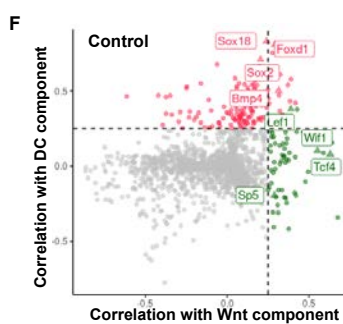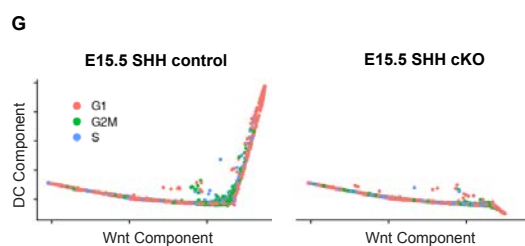

**Figure S5. Related to Figure 5. Dermal SHH activation is required for transition to quiescence and is due to a cell-autonomous requirement for dermal SHH signaling**

**(A)** %Caspase3+ apoptotic dermal cells in control and SHH cKO at E14.5 and E15.5 (n=3). **(B)**, Skin whole mounts of E14.5 and E15.5 Fucci2+ control and *K14Cre;Shh<sup>fl/fl</sup>* stained for RFP, Ki-67, Pcad (left). White arrowheads, Ki67-/MCherry+ cluster. Quantification of MCherry+ (G0/G1) cells/DC and %Ki67+ cells per MCherry+ cluster at E15.5 (right, n=3). **(C)** Skin whole mounts of control and *K14Cre;Smo<sup>fl/fl</sup>* skin explants at E14.5, E15.5 and E16.5 and corresponding FISH showing where *Ptch1*+ and *Lef1*+ are located over time in control and Smo cKO mutants (n=3 per time point; yellow arrowheads, peri-DC *Ptch1/Lef1* co-positive cells; white asterisk, Merkel cell). **(D)** Quantification of number of Sox2+ DC cells in control and *K14Cre;Smo<sup>fl/fl</sup>* embryos or proportion of peri-DC cells and Sox2+ DC cells copositive for *Lef1* and *Ptch1* in control and *K14Cre;Smo<sup>fl/fl</sup>* embryos at each time point (n=4). **(E)** UMAPs of E15.5 epidermal populations overlaid by condition or with canonical epidermal placode markers. **(F)** Correlation plot of top 2000 variable genes by Wnt and DC components (threshold 0.25), based on the diffusion maps of combined E14.5 control and *K14Cre;Shh<sup>fl/fl</sup>* dermal cells. **(G)** Diffusion maps of E15.5 dermal cells parsed by condition showing cell cycle phase. Data as mean  $\pm$  SEM, \* $P < 0.05$ , \*\* $P < 0.01$ , \*\*\* $P < 0.001$  and \*\*\*\* $P < 0.0001$ , Student's *t*-test, n=3; ns, not significant. Scale bars, 50  $\mu$ m.

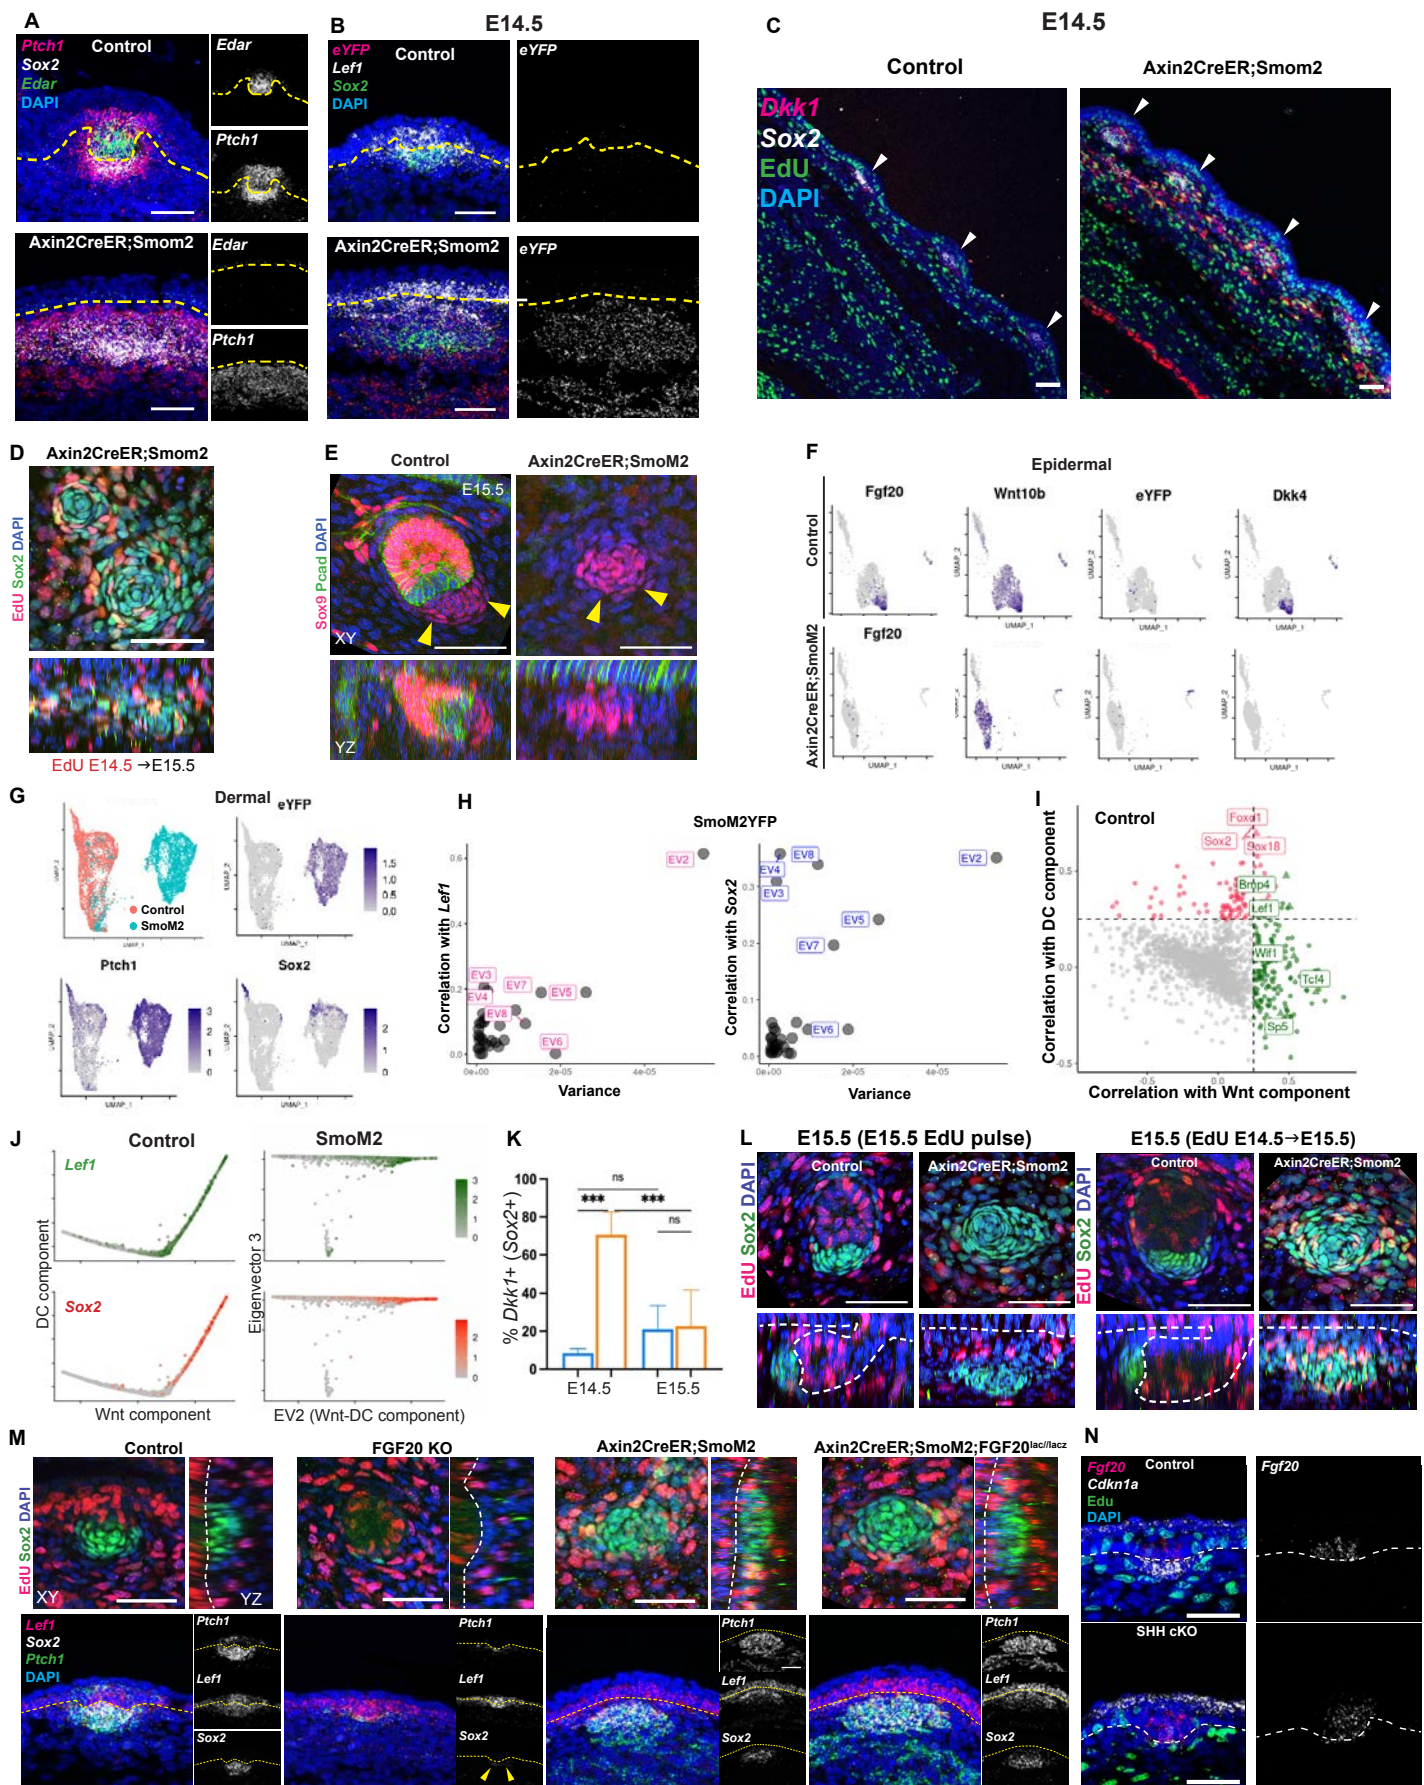



**Figure S6. Related to Figure 6. Dermal SHH activation induces DC genesis in early Wnt-active cells independent of placodes**

**(A)** FISH: E14.5 control and *SmoM2YFP* stained for *Ptch1*, *Sox2*, *Edar*. **(B)** FISH: control and *SmoM2YFP* stained for *eYFP*, *Lef1*, *Sox2*. **(C)** Low power axial view of E14.5 dorsolateral flank skin stained for *Dkk1*, *Sox2*, EdU. **(D)** Skin whole mount of E15.5 *SmoM2YFP* mutant showing abutting DCs (EdU pulsed at E14.5). **(E)** Skin whole mount of control and mutant stained with placode and DC marker, Sox9. **(F)** UMAPs of E14.5 epidermal populations parsed by condition with placode gene markers and *eYFP*. **(G)** UMAPs of E14.5 dermal populations showing *eYFP*, *Ptch1* and *Sox2*. **(H)** Calculating correlation between leading 30 eigenvectors (EV) of *SmoM2YFP* diffusion maps and expression level of *Lef1* or *Sox2*, as well as variance of eigenvectors that indicate relative informativeness. **(I)** Correlation plot of top 2000 variable genes by Wnt and DC components (threshold 0.25), based on the diffusion maps of E14.5 wildtype dermal cells. **(J)** Dermal diffusion maps of E14.5 control and *SmoM2YFP* biological replicate scRNA-seq data with *Sox2* and *Lef1* expression shown. **(K)** Proportion of Sox2+ cells co-expressing *Dkk1* at E14.5 in control and mutant (n=3). **(L)** Skin whole mount views of E15.5 control and mutant pulsed with EdU and harvested 1.5 hours or 24 hours later (n=3). **(M)** Whole mount 3D images of E14.5 control, *FGF20<sup>lacZ/lacZ</sup>*, *SmoM2YFP* and *SmoM2YFP;FGF20<sup>lacZ/lacZ</sup>* embryos after EdU pulse (top). E14.5 FISH: *Lef1*, *Sox2*, *Ptch1* across conditions (bottom) (n=5). **(N)** Representative FISH: E14.5 control and SHH cKO stained for *Fgf20*, *Cdkn1a*, EdU (n=3). Data as mean  $\pm$  SEM, \* $P < 0.05$ , \*\* $P < 0.01$ , \*\*\* $P < 0.001$  and \*\*\*\* $P < 0.0001$ , one-way ANOVA; n=3; ns, not significant. Scale bars, 50  $\mu$ m.

**A** Axin2CreER; $\beta$ cat<sup>EX3</sup>;SmoM2

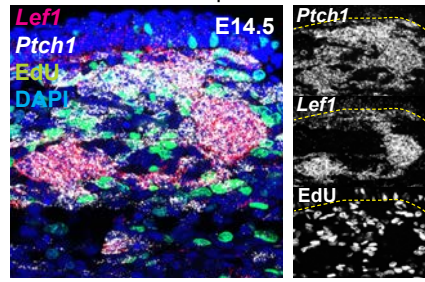

**B** Sox2+ %EdU

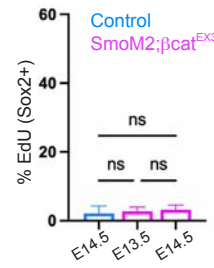

**C**

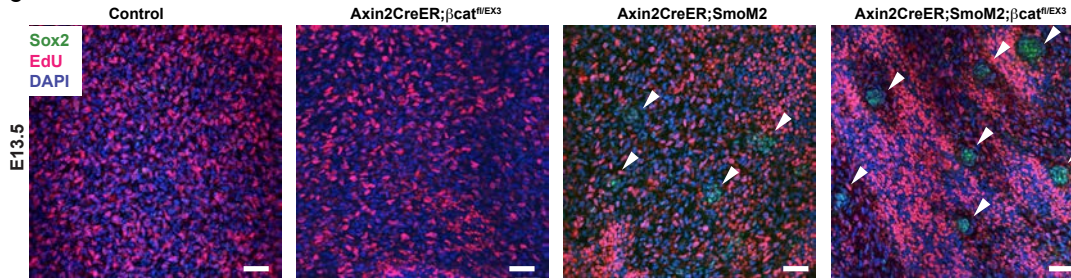

**E13.5 DC density**

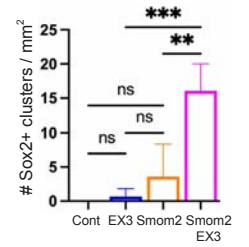

**D** E13.5 *Lef1* expression

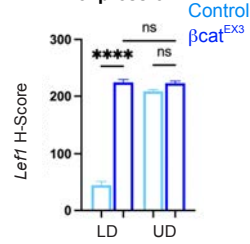

**E** E13.5 *Lef1* expression

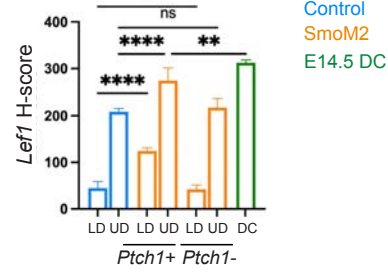

**F**

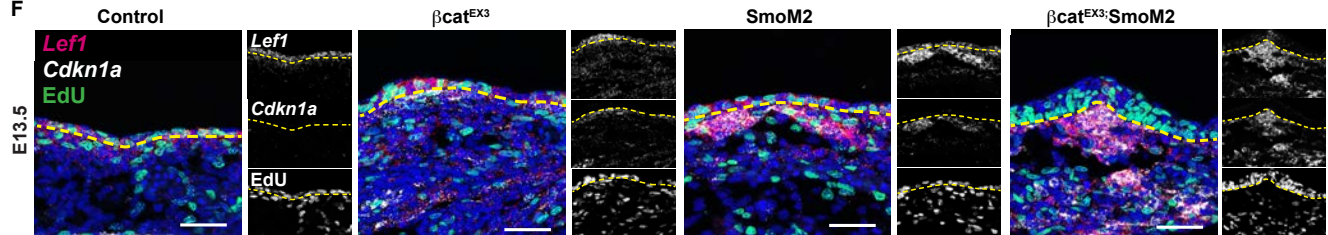

**Figure S7. Related to Figure 6 and 7. Co-activation of sufficient levels of dermal SHH and Wnt signaling induces DCs prior to HF morphogenesis**

**(A)** FISH of E14.5 control and *SmoM2YFP;βcat<sup>fl/EX3</sup>* embryos showing quiescent Sox2<sup>+</sup> clusters in the UD and LD that co-express *Lef1* and *Ptch1*. **(B)** %EdU<sup>+</sup> of Sox2<sup>+</sup> cells in E14.5 control and *SmoM2YFP;βcat<sup>fl/EX3</sup>* DCs and E13.5 *SmoM2YFP;βcat<sup>fl/EX3</sup>* DCs. **(C)** Widefield view (500 x 500 μm) of skin whole mounts of E13.5 control and indicated mutants (white arrowheads, DCs) and quantification of DC density by condition (per mm<sup>2</sup>). **(D)** *Lef1* levels (H-score) of E13.5 control and *βcat<sup>fl/EX3</sup>* in the LD or UD. **(E)** *Lef1* levels (H-score) of E13.5 control, *Ptch1*<sup>+</sup> (*SmoM2YFP* mutant) or *Ptch1*<sup>-</sup> (WT, un-recombined cells) in the LD or UD; *Lef1* levels of E14.5 WT DC cells are shown as green bar. **(F)** FISH showing expression of *Cdkn1a*, *Lef1*, and EdU across conditions at E13.5. Data as mean ± SEM, \**P*<0.05, \*\**P*<0.01, \*\*\**P*<0.001 and \*\*\*\**P*<0.0001, one-way ANOVA; n=3; ns, not significant. Scale bars, 50 μm
